# Supplementary material
Source: bioRxiv or medRxiv preprint supplement (http://www.biorxiv.org/highwire/filestream/28350/field_highwire_adjunct_files/0/099747-1.pdf)
Supplement: Supplementary file [file 099747-1.pdf]

## Supplementary material

### Targeting the PD-1/PD-L1 pathway potentiates immunoediting to counterbalance neutral evolution in a mouse model of colorectal cancer

Mirjana Efremova<sup>1</sup>, Victoria Klepsch<sup>2</sup>, Pornpimol Charoentong<sup>1</sup>, Francesca Finotello<sup>1</sup>, Dietmar Rieder<sup>1</sup>, Hubert Hackl<sup>1</sup>, Natascha Hermann-Kleiter<sup>2</sup>, Gottfried Baier<sup>2</sup>, Anne Krogsdam<sup>1</sup>, Zlatko Trajanoski<sup>1\*</sup>

<sup>1</sup>Biocenter, Division of Bioinformatics, Medical University of Innsbruck, Innsbruck, Austria

<sup>2</sup>Division of Translational Cell Genetics, Medical University of Innsbruck, Innsbruck, Austria

The supplementary material contains:

|                                                                                                                                                                                                   |    |
|---------------------------------------------------------------------------------------------------------------------------------------------------------------------------------------------------|----|
| Figure S1. Enriched pathways of the significantly upregulated genes in the MC38 cell line vs normal skin samples. The pie chart is created using ClueGO.....                                      | 2  |
| Figure S2. z-score heatmap of the log <sub>2</sub> transformed normalized counts of chemokines and chemokine receptors in MC38, wild type and RAG1 <sup>-/-</sup> samples.....                    | 3  |
| Figure S3. z-score heatmap of the log <sub>2</sub> transformed normalized counts of selected genes in MC38, wild type and RAG1 <sup>-/-</sup> samples.....                                        | 4  |
| Figure S4. Enriched pathways of the significantly upregulated and downregulated genes in the wild type day 23 vs RAG1 <sup>-/-</sup> day 23 tumors. The pie charts are created using ClueGO.....  | 5  |
| Figure S5. Enriched pathways of the significantly upregulated and downregulated genes in the antiPD-L1 vs the IgG2b tumors. The pie charts are created using ClueGO.....                          | 6  |
| Figure S6. z-score heatmap of the log <sub>2</sub> transformed normalized counts of selected genes in the anti-PD-L1 and the IgG2b samples.....                                                   | 7  |
| Table S1. Number of mutations that changed their variant allele frequencies (VAF) and cancer cell fractions (CCF) between time points in the three wild type and RAG1 <sup>-/-</sup> samples..... | 8  |
| Table S2. List of expressed predicted neoantigens present in the MC38 cell line and the RAG1 <sup>-/-</sup> samples from day 23, and absent from the wild type samples from day 23.....           | 9  |
| Table S3. List of expressed predicted neoantigens present in the MC38 cell line and the IgG2b control samples, and absent from the anti-PD-L1 samples.....                                        | 10 |

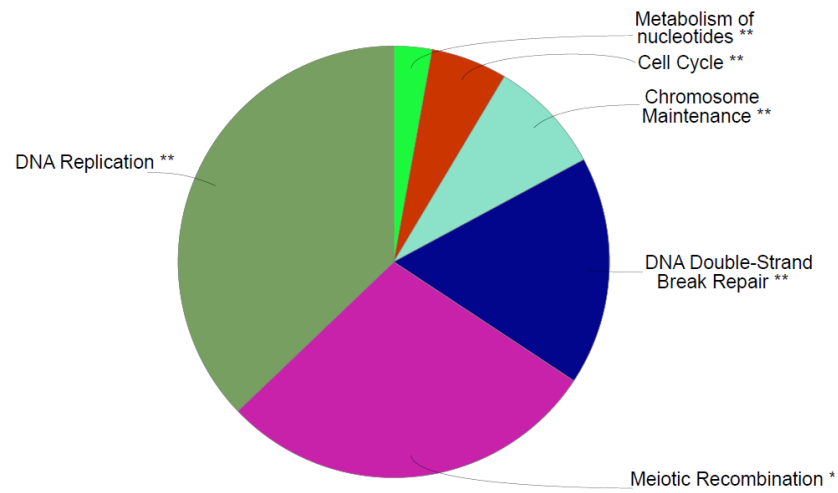

Figure S1. Enriched pathways of the significantly upregulated genes in the MC38 cell line vs normal skin samples. The pie chart is created using ClueGO and shows the enriched groups (the name of the group is given by the most significant term). The sizes of the sections correlate with the number of terms included in a group.





**A**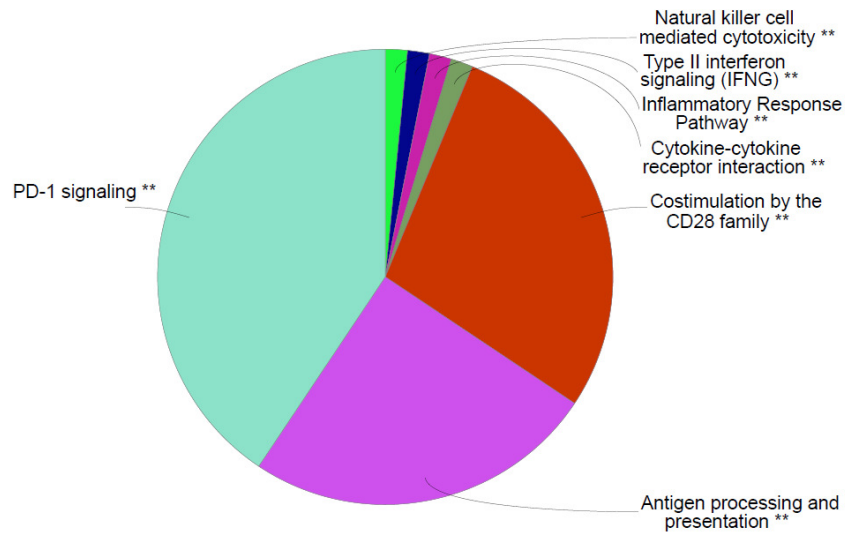**B**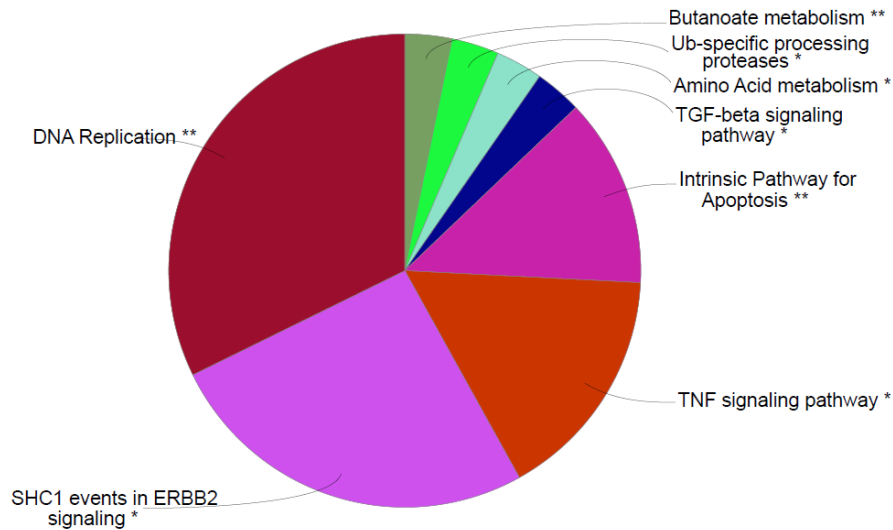

Figure S4. Enriched pathways of the significantly A) upregulated and B) downregulated genes in wild type day 23 vs RAG1<sup>-/-</sup> day 23 tumors. The pie chart is created using ClueGO and shows the enriched groups (the name of the group is given by the most significant term). The sizes of the sections correlate with the number of terms included in a group.

**A**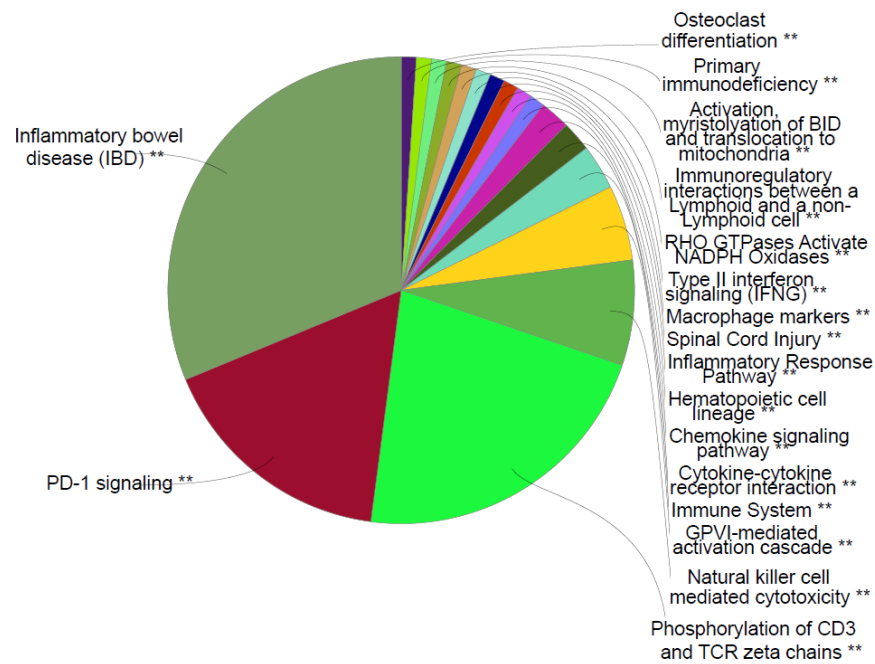**B**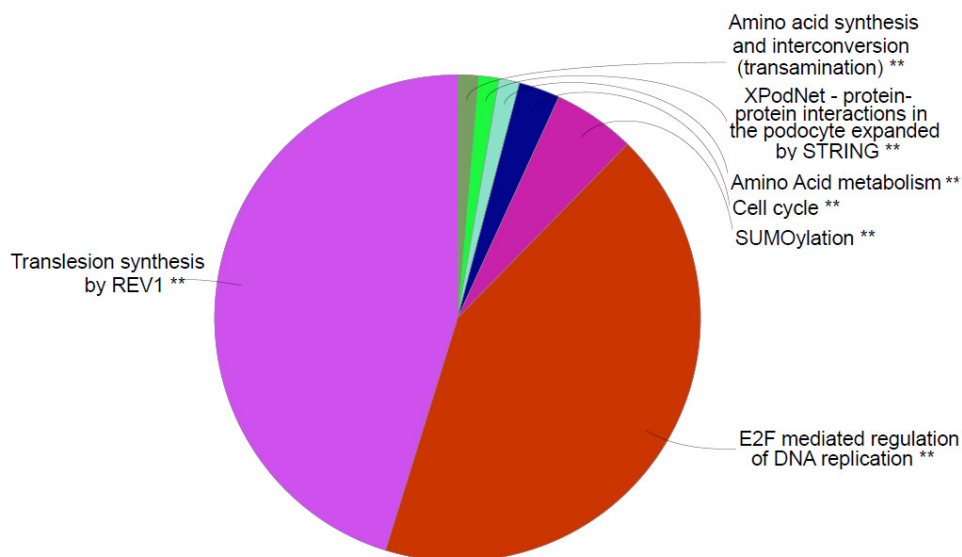

Figure S5. Enriched pathways of the significantly A) upregulated and B) downregulated genes in the antiPD-L1 vs the IgG2b tumors. The pie chart is created using ClueGO and shows the enriched groups (the name of the group is given by the most significant term). The sizes of the sections correlate with the number of terms included in a group.



Table S1. Number of mutations that changed their variant allele frequencies (VAF) and cancer cell fractions (CCF) between time points in the three wt and RAG1<sup>-/-</sup> samples out of the total 3394 (shared between wt23 and wt46) and 3443 (shared between RAG1<sup>-/-</sup>13 and RAG1<sup>-/-</sup>23) mutations.

| wt23 vs wt46 diff in VAF > 0.2 | wt23 vs wt46 diff in CCF > 0.3 | wt23 vs wt46 not shared mutations | RAG1 <sup>-/-</sup> 13 vs RAG1 <sup>-/-</sup> 23 diff in VAF > 0.2 | RAG1 <sup>-/-</sup> vs RAG1 <sup>-/-</sup> 23 diff in CCF > 0.3 | RAG1 <sup>-/-</sup> vs RAG1 <sup>-/-</sup> 23 not shared mutations |
|--------------------------------|--------------------------------|-----------------------------------|--------------------------------------------------------------------|-----------------------------------------------------------------|--------------------------------------------------------------------|
| 138                            | 496                            | 1057                              | 113                                                                | 446                                                             | 1087                                                               |
| 177                            | 542                            | 1031                              | 105                                                                | 394                                                             | 1130                                                               |
| 144                            | 614                            | 1015                              | 125                                                                | 675                                                             | 1004                                                               |



Table S2. List of expressed predicted neoantigens present in the MC38 cell line and the RAG1<sup>-/-</sup> samples from day 23, and absent from the wild type samples from day 23

| Peptide_mut | Chr   | Start     | Ref | Alt | Gene    | Protein            | Amino_acids | Db_nM  | Db_Rank | Kb_nM  | Kb_Rank |
|-------------|-------|-----------|-----|-----|---------|--------------------|-------------|--------|---------|--------|---------|
| YLVANDGEI   | chr15 | 6658562   | A   | C   | Fyb     | ENSMUSP00000087947 | D/A         | 285.48 | 0.125   | NA     | NA      |
| ASFHSGNI    | chr3  | 145314878 | A   | G   | Col24a1 | ENSMUSP00000029848 | T/A         | NA     | NA      | 145.5  | 0.5     |
| LTLLAGLL    | chr7  | 43468715  | G   | A   | Vsig10l | ENSMUSP00000103611 | A/T         | NA     | NA      | 482.14 | 1.3     |
| LGLTLLAGL   | chr7  | 43468715  | G   | A   | Vsig10l | ENSMUSP00000103611 | A/T         | NA     | NA      | 310.16 | 0.9     |
| KGTLYYYTL   | chr10 | 80322726  | G   | T   | Pcsk4   | ENSMUSP00000020340 | T/K         | NA     | NA      | 39.498 | 0.125   |
| IPEYVSAF    | chr11 | 82987611  | T   | C   | Sifn9   | ENSMUSP00000044435 | I/V         | NA     | NA      | 190.61 | 0.6     |
| IGDLRLATL   | chr11 | 101263944 | G   | A   | Wnk4    | ENSMUSP00000099397 | G/R         | NA     | NA      | 301    | 0.9     |
| KGYFFNKGTL  | chr10 | 80322726  | G   | T   | Pcsk4   | ENSMUSP00000020340 | T/K         | NA     | NA      | 150.84 | 0.5     |
| KGTLYYYTLL  | chr10 | 80322726  | G   | T   | Pcsk4   | ENSMUSP00000020340 | T/K         | NA     | NA      | 50.742 | 0.175   |
| LSFLCRYVAV  | chr17 | 56769541  | C   | G   | Dus3l   | ENSMUSP00000007747 | P/A         | NA     | NA      | 109.83 | 0.4     |
| NKGYFFNKGTL | chr10 | 80322726  | G   | T   | Pcsk4   | ENSMUSP00000020340 | T/K         | NA     | NA      | 482.24 | 1.3     |
| FNKGTLYYYTL | chr10 | 80322726  | G   | T   | Pcsk4   | ENSMUSP00000020340 | T/K         | NA     | NA      | 353.97 | 1       |
| NKGTLYYYTLL | chr10 | 80322726  | G   | T   | Pcsk4   | ENSMUSP00000020340 | T/K         | NA     | NA      | 134.84 | 0.5     |
| KGTLYYYTLLL | chr10 | 80322726  | G   | T   | Pcsk4   | ENSMUSP00000020340 | T/K         | NA     | NA      | 115.6  | 0.4     |
| IMRKCFPQNRL | chr13 | 59512429  | T   | G   | Agtpbp1 | ENSMUSP00000022040 | K/Q         | NA     | NA      | 361.08 | 1       |
| WLSFLCRYVAV | chr17 | 56769541  | C   | G   | Dus3l   | ENSMUSP00000007747 | P/A         | NA     | NA      | 326.53 | 0.9     |
| SSLLAGPRL   | chr9  | 108448377 | T   | A   | Klhdc8b | ENSMUSP00000142325 | Q/L         | NA     | NA      | 378.61 | 1.1     |

Table S3. List of expressed predicted neoantigens present in the MC38 cell line and the IgG2b control samples, and absent from the anti-PD-L1 samples

| Peptide_mut | Chr   | Start     | Ref | Alt | Gene     | Protein            | Amino_acid | Db_nM    | Db_Rank | Kb_nM    | Kb_Rank |
|-------------|-------|-----------|-----|-----|----------|--------------------|------------|----------|---------|----------|---------|
| AQLANDVVL   | chr10 | 18056095  | C   | G   | Reps1    | ENSMUSP00000123238 | P/A        | 39.083   | 0.015   | NA       | NA      |
| ISFVNAIPW   | chr11 | 75489864  | A   | C   | Prpf8    | ENSMUSP00000018449 | E/A        | 407.2091 | 0.15    | 206.0801 | 0.6     |
| YFLDNLDL    | chr11 | 109392383 | A   | C   | Gna13    | ENSMUSP00000020930 | K/T        | 186.9848 | 0.08    | NA       | NA      |
| YLVANDGEI   | chr15 | 6658562   | A   | C   | Fyb      | ENSMUSP00000087947 | D/A        | 285.4786 | 0.125   | NA       | NA      |
| YSLLLDTYI   | chr15 | 37945070  | T   | G   | Rrm2b    | ENSMUSP00000022901 | I/L        | 51.0251  | 0.02    | NA       | NA      |
| AAQLANDVVL  | chr10 | 18056095  | C   | G   | Reps1    | ENSMUSP00000123238 | P/A        | 102.2957 | 0.05    | NA       | NA      |
| APSLLNWTRV  | chr10 | 82699172  | G   | C   | Hcfc2    | ENSMUSP00000020478 | R/T        | 465.7171 | 0.175   | NA       | NA      |
| ISFVNAIPWV  | chr11 | 75489864  | A   | C   | Prpf8    | ENSMUSP00000018449 | E/A        | 119.3035 | 0.05    | NA       | NA      |
| KALLNGDGAI  | chr14 | 24164486  | C   | A   | Dlg5     | ENSMUSP00000087879 | E/D        | 34.5384  | 0.015   | NA       | NA      |
| RAAQLANDVVL | chr10 | 18056095  | C   | G   | Reps1    | ENSMUSP00000123238 | P/A        | 241.6992 | 0.09    | NA       | NA      |
| AQLANDVVLQI | chr10 | 18056095  | C   | G   | Reps1    | ENSMUSP00000123238 | P/A        | 496.5346 | 0.175   | NA       | NA      |
| AAPSLLNWTRV | chr10 | 82699172  | G   | C   | Hcfc2    | ENSMUSP00000020478 | R/T        | 439.9904 | 0.15    | NA       | NA      |
| ISFVNAIPWVI | chr11 | 75489864  | A   | C   | Prpf8    | ENSMUSP00000018449 | E/A        | 111.3205 | 0.05    | NA       | NA      |
| IKALLNGDGAI | chr14 | 24164486  | C   | A   | Dlg5     | ENSMUSP00000087879 | E/D        | 434.6625 | 0.15    | NA       | NA      |
| IATVQAFL    | chr2  | 12410009  | G   | T   | Fam188a  | ENSMUSP00000028105 | P/T        | NA       | NA      | 440.4284 | 1.2     |
| LSYLRATL    | chr2  | 120030296 | G   | C   | Jmjd7    | ENSMUSP00000041220 | V/L        | NA       | NA      | 9.8735   | 0.02    |
| ICYGSAPL    | chr3  | 110250130 | C   | A   | Prmt6    | ENSMUSP00000140836 | S/I        | NA       | NA      | 109.7087 | 0.4     |
| YAFASQV     | chr6  | 28885053  | T   | G   | Snd1     | ENSMUSP00000001460 | I/S        | NA       | NA      | 11.6314  | 0.025   |
| KARKYFEL    | chr7  | 28185387  | G   | T   | Dyrk1b   | ENSMUSP00000083064 | R/L        | NA       | NA      | 138.8444 | 0.5     |
| LTLLAGLL    | chr7  | 43468715  | G   | A   | Vsig10l  | ENSMUSP00000103611 | A/T        | NA       | NA      | 482.1449 | 1.3     |
| KILTFDRL    | chr7  | 45720370  | A   | G   | Rpl18    | ENSMUSP00000103365 | Q/R        | NA       | NA      | 102.6694 | 0.4     |
| LTFDRLAL    | chr7  | 45720370  | A   | G   | Rpl18    | ENSMUSP00000103365 | Q/R        | NA       | NA      | 71.8819  | 0.25    |
| AMFLGANV    | chr9  | 57546426  | T   | C   | Mpi      | ENSMUSP00000034856 | D/G        | NA       | NA      | 126.6132 | 0.4     |
| TSSGYPTL    | chr9  | 102885994 | G   | C   | Ryk      | ENSMUSP00000135858 | S/T        | NA       | NA      | 290.6021 | 0.9     |
| FVM DYIPV   | chr10 | 7705809   | G   | T   | Lats1    | ENSMUSP00000132078 | G/V        | NA       | NA      | 205.7593 | 0.6     |
| SSYAHGGF    | chr11 | 55487518  | G   | T   | G3bp1    | ENSMUSP00000018727 | L/F        | NA       | NA      | 46.7578  | 0.15    |
| VSRHHRAL    | chr11 | 72796528  | G   | C   | Zzef1    | ENSMUSP00000068790 | G/R        | NA       | NA      | 285.9487 | 0.8     |
| VIATVQAFL   | chr2  | 12410009  | G   | T   | Fam188a  | ENSMUSP00000028105 | P/T        | NA       | NA      | 468.1571 | 1.3     |
| SVYGEVSRL   | chr2  | 129066190 | C   | G   | Ttl      | ENSMUSP00000046883 | A/G        | NA       | NA      | 96.1962  | 0.3     |
| KSFRQKPNL   | chr6  | 48619619  | C   | G   | Zfp775   | ENSMUSP00000056290 | S/R        | NA       | NA      | 93.9273  | 0.3     |
| AGLRRLLLM   | chr7  | 25203598  | C   | A   | Dedd2    | ENSMUSP00000049763 | R/L        | NA       | NA      | 430.6135 | 1.2     |
| KARKYFELL   | chr7  | 28185387  | G   | T   | Dyrk1b   | ENSMUSP00000083064 | R/L        | NA       | NA      | 77.7964  | 0.25    |
| LGLTLAGL    | chr7  | 43468715  | G   | A   | Vsig10l  | ENSMUSP00000103611 | A/T        | NA       | NA      | 310.1638 | 0.9     |
| ISPTVRATL   | chr9  | 21981403  | C   | A   | Rgl3     | ENSMUSP00000035726 | V/L        | NA       | NA      | 162.2901 | 0.5     |
| LNWTRVSSF   | chr10 | 82699172  | G   | C   | Hcfc2    | ENSMUSP00000020478 | R/T        | NA       | NA      | 290.533  | 0.9     |
| SAWVPFGGL   | chr10 | 128802236 | C   | A   | Tmem198b | ENSMUSP00000050451 | V/F        | NA       | NA      | 42.9606  | 0.15    |
| VSRHHRALL   | chr11 | 72796528  | G   | C   | Zzef1    | ENSMUSP00000068790 | G/R        | NA       | NA      | 149.4984 | 0.5     |
| IPEYVSFAF   | chr11 | 82987611  | T   | C   | Sifn9    | ENSMUSP00000044435 | I/V        | NA       | NA      | 190.6065 | 0.6     |

|             |       |           |   |   |          |                    |     |          |       |          |       |
|-------------|-------|-----------|---|---|----------|--------------------|-----|----------|-------|----------|-------|
| IGDLRLATL   | chr11 | 101263944 | G | A | Wnk4     | ENSMUSP00000099397 | G/R | NA       | NA    | 300.9963 | 0.9   |
| VSLKGLCQL   | chr11 | 116069391 | T | C | Unc13d   | ENSMUSP00000074549 | E/G | NA       | NA    | 325.2974 | 0.9   |
| AGFTKLAPV   | chr13 | 89704367  | G | C | Vcan     | ENSMUSP00000105173 | P/A | NA       | NA    | 53.1282  | 0.175 |
| SIQDFLLRM   | chr14 | 65648256  | G | C | Nuggc    | ENSMUSP00000078434 | M/I | NA       | NA    | 205.8907 | 0.6   |
| WSLSYLRTL   | chr2  | 120030296 | G | C | Jmjd7    | ENSMUSP00000041220 | V/L | NA       | NA    | 415.0376 | 1.2   |
| SAWVPFGGLM  | chr10 | 128802236 | C | A | Tmem198b | ENSMUSP00000050451 | V/F | NA       | NA    | 481.1183 | 1.3   |
| VHSEMYLLLL  | chr15 | 37945070  | T | G | Rrm2b    | ENSMUSP00000022901 | I/L | NA       | NA    | 377.1472 | 1.1   |
| LSFLCRYVAV  | chr17 | 56769541  | C | G | Dus3l    | ENSMUSP00000007747 | P/A | NA       | NA    | 109.8274 | 0.4   |
| IMRKCFQNR   | chr13 | 59512429  | T | G | Agtpbp1  | ENSMUSP00000022040 | K/Q | NA       | NA    | 361.0831 | 1     |
| AGFTKLAPVPL | chr13 | 89704367  | G | C | Vcan     | ENSMUSP00000105173 | P/A | NA       | NA    | 221.6772 | 0.7   |
| ISWVKEGFTFL | chr16 | 73978491  | G | C | Robo2    | ENSMUSP00000112776 | L/V | NA       | NA    | 63.4355  | 0.2   |
| WLSFLCRYVAV | chr17 | 56769541  | C | G | Dus3l    | ENSMUSP00000007747 | P/A | NA       | NA    | 326.5283 | 0.9   |
| ALYINLAAI   | chr18 | 61989909  | C | A | Sh3tc2   | ENSMUSP00000055094 | Y/* | 308.6139 | 0.125 | NA       | NA    |
| AALYINLAAI  | chr18 | 61989909  | C | A | Sh3tc2   | ENSMUSP00000055094 | Y/* | 52.0202  | 0.025 | NA       | NA    |
| VAALYINLAAI | chr18 | 61989909  | C | A | Sh3tc2   | ENSMUSP00000055094 | Y/* | 286.6858 | 0.125 | 415.9277 | 1.2   |
